# Supplementary material for: 3D porous and redox-active prussian blue-in-graphene aerogels for highly efficient electrochemical detection of H2O2
Source: Royal Society of Chemistry journal article supplement (doi:10.1039/c2jm34541b), 2012-01-01
Supplement: c2jm34541b.pdf [file c2jm34541b.pdf]

## Supporting Information for

### **3D porous and redox-active prussian blue-in-graphene aerogels for highly efficient electrochemical detection of H<sub>2</sub>O<sub>2</sub>**

*Liang Chen, xiaojuan Wang, Xuotong Zhang\* and huimin Zhang\**

School of Materials Science & Engineering, Beijing Institute of Technology, Beijing 100081,  
P. R. China.

School of Chemistry, Beijing Institute of Technology, Beijing, 100081, P. R. China

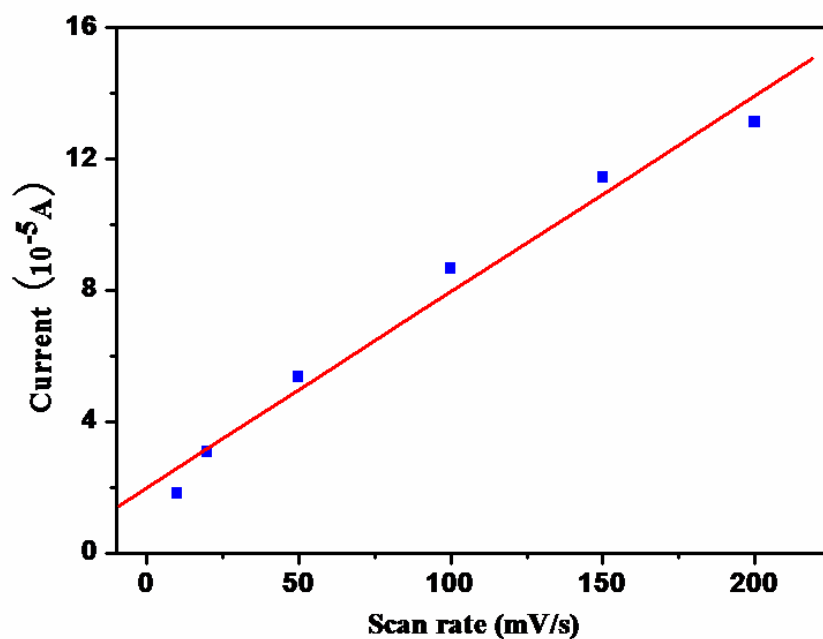

**Fig. S11** Plot of peak current versus scan rate for PB@G aerogel modified electrode

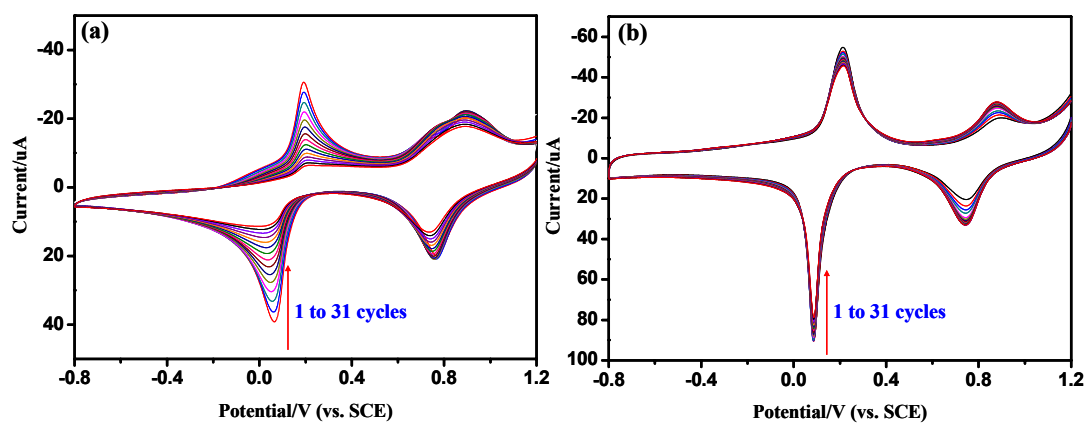

**Fig. SI2.** Cyclic voltammety profiles of both PB powder (a) and PB@G aerogel (b) modified electrodes in 0.1 M PBS aqueous solution (pH = 7) at a scan rate of 50 mV s<sup>-1</sup> (Only odd cycles were shown for clarity).

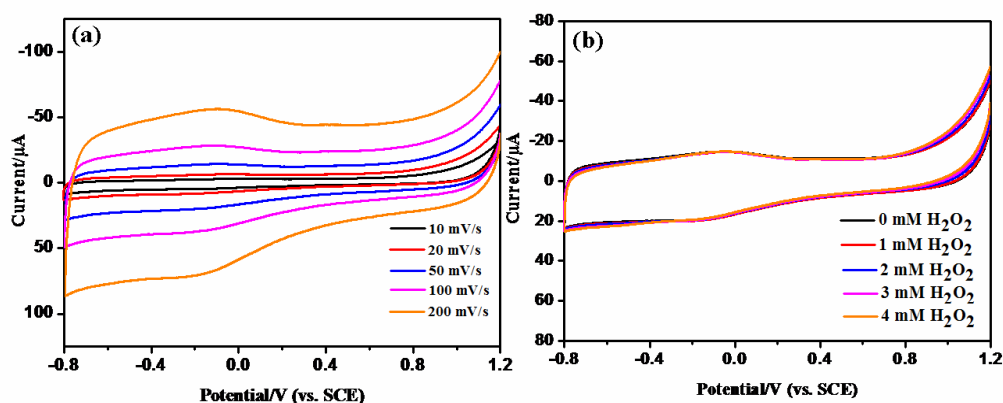

**Fig. S13** (a) Cyclic voltammetry of the pure graphene aerogel modified electrode at a scan rate of 10, 20, 50, 100, 150 and 200 mV s<sup>-1</sup> and (b) cyclic voltammetry of graphene aerogel modified electrode with addition of different concentration of H<sub>2</sub>O<sub>2</sub>. The CV curve of graphene aerogel modified electrode presents a typical irregular rectangular shape and no obvious redox peaks were observed in comparison with that of the PB@G aerogel modified electrode. With addition of different concentration of H<sub>2</sub>O<sub>2</sub>, no apparent reduction peak can be observed, implying that the graphene aerogel can't electro-catalyze the reduction of H<sub>2</sub>O<sub>2</sub>.

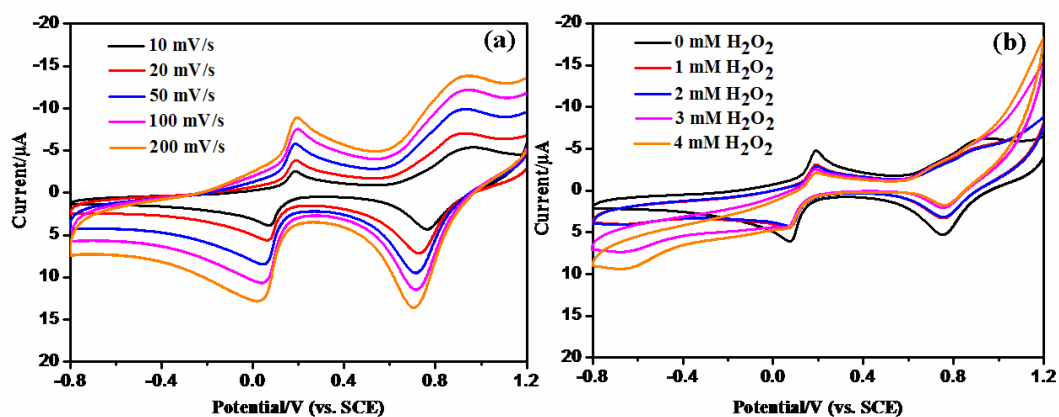

**Fig. SI4.** (a) Cyclic voltammetry of the PB powder modified electrode at a scan rate of 10, 20, 50, 100, 150 and 200  $\text{mV s}^{-1}$  and (b) cyclic voltammetry of PB powder modified electrode with addition of different concentration of  $\text{H}_2\text{O}_2$ . An apparent reduction peak centered at  $-0.60$  V can be observed from (b), which is much lower than that of PB@G aerogel modified electrode.

**Table SII** Porous attribute of the resulting PB@G aerogels with different mass ratios of graphene to PB.

| Sample ID                                      | <b>PB@G-1</b> | <b>PB@G-2</b> | <b>PB@G-3</b> |
|------------------------------------------------|---------------|---------------|---------------|
| Graphene wt. %                                 | 71.4          | 50.0          | 28.6          |
| BET area (m <sup>2</sup> g <sup>-1</sup> )     | 601           | 543           | 316           |
| Pore volume (cm <sup>3</sup> g <sup>-1</sup> ) | 3.751         | 3.669         | 1.348         |
| Pore size (nm)                                 | 25            | 27            | 17            |
| Density (mg cm <sup>-3</sup> )                 | 45 ± 2        | 57 ± 2        | 60 ± 2        |

**Table S12** Performance comparison table of various electrodes in electrochemical detection of H<sub>2</sub>O<sub>2</sub>

| Electrode                                    | Limit of detection      | Linear range                                 | Reference                                                 |
|----------------------------------------------|-------------------------|----------------------------------------------|-----------------------------------------------------------|
| PB@G aerogel                                 | 0.005 $\mu$ M           | 0.005 ~ 4 mM                                 | Our work                                                  |
| PB/rGO                                       | 0.045 $\mu$ M           | $5 \times 10^{-5}$ ~ 0.12 mM                 | ACS Appl. Mater. Interfaces, 2010, 2 (8), 2339–2346       |
| PB-graphene                                  | 7 $\mu$ M               | 0.01 ~ 1.44 mM                               | Talanta, 15 (2011) 76-81                                  |
| GO/PB                                        | 0.122 $\mu$ M           | 0.0005 ~ 1.2 mM                              | Electrochimica Acta 56 (2011) 1239–1245                   |
| MCNT/PB                                      | 0.02 $\mu$ M            | 0.0005–0.03 mM                               | Adv. Funct. Mater. 2009, 19, 3980–3986                    |
| PG/MWNTs/PB                                  | 1 $\mu$ M               | 0.001 ~ 5 mM                                 | Journal of Electroanalytical Chemistry 603 (2007) 59–66   |
| PB–MWCNT/Au                                  | 0.023 $\mu$ M           | 0.001 ~ 5 mM                                 | J. Mater. Chem., 2010, 20, 1532–1537                      |
| PB-MCNT                                      | 0.567 $\mu$ M           | 0.01 ~ 0.4 mM                                | Electroanalysis, 2009, 21, 20, 2207-2212                  |
| CNTs/PB                                      | $\approx$ 0.005 $\mu$ M | $5 \times 10^{-4}$ ~ $3 \times 10^{-3}$ mM   | J. Mater. Chem., 2012, 22, 1824-1833                      |
| MWCNTs/Ag/PB                                 | 0.04 $\mu$ M            | $8 \times 10^{-5}$ ~ 5 mM                    | Anal. Sci., 2010, 26, 343                                 |
| MWCNT/PVP/PB                                 | 0.025 $\mu$ M           | ---                                          | Adv. Funct. Mater. 2007, 17, 1574–1580                    |
| CNT/AuNPs/PB                                 | 3.36 $\mu$ M            | 0.004 ~ 0.019 mM                             | Microchim Acta 2009, 167, 167-172                         |
| PB/OMC                                       | 1 $\mu$ M               | 0.1 ~ 1.5 mM                                 | Microporous and Mesoporous Materials 119 (2009) 193–199   |
| Glutamate oxidase/PB                         | 0.1 $\mu$ M             | $10^{-4}$ –0.1 mM                            | Anal. Chem. 2000, 72, 1720-1723                           |
| PB Nanoelectrode                             | 0.01 $\mu$ M            | $10^{-5}$ ~ 10 mM                            | Anal. Chem. 2004, 76, 474-478                             |
| PBNPs/Nafion                                 | 1 $\mu$ M               | 0.002 ~ 0.14 mM                              | Sensors and Actuators B 147 (2010) 270–276                |
| thionin/EDTA/CNT/chitosan                    | 0.065 $\mu$ M           | $2 \times 10^{-4}$ – $8.5 \times 10^{-2}$ mM | Microchim Acta (2010) 171:139–144                         |
| CNT/SCN                                      | 0.3 $\mu$ M             | $5 \times 10^{-4}$ ~ 1.67 mM                 | Chem. Mater. 2009, 21, 2247–2257                          |
| PNEGHs                                       | 0.08 $\mu$ M            | 0.001 ~ 0.5 mM                               | ACS Nano, 2010, 4 (7), 3959–3968                          |
| MWCNTs/Th                                    | 0.38 $\mu$ M            | 0.02 ~ 0.16 mM                               | Electroanalysis 19 (2007) 1100–1108                       |
| CNTs/CB                                      | 10 $\mu$ M              | 0.1 ~ 1 mM                                   | Electroanalysis 20 (2008) 1788–1797                       |
| N-doped CNT                                  | 0.37 $\mu$ M            | $1.76 \times 10^{-3}$ ~ 0.139 mM             | ACS Nano, 2010, 4 (7), 4292–4298                          |
| HRP/sulfonated-G                             | 1.17 $\mu$ M            | $3.5 \times 10^{-3}$ ~ 0.329 mM              | Electroanalysis 2011, 23, No. 4, 900 – 906                |
| MWNTs–PANI                                   | 0.005 $\mu$ M           | $8 \times 10^{-6}$ ~ $5 \times 10^{-3}$ mM   | Talanta 72 (2007) 437–442                                 |
| PNEGHs                                       | 0.08 $\mu$ M            | 0.001 ~ 0.5 mM                               | ACS Nano, 2010, 7, 3959-3968                              |
| HRP/GMA-co-VFc                               | 2.6 $\mu$ M             | 2.0 ~ 30 mM                                  | Sensors and Actuators B 145 (2010) 444–450                |
| HI-ePt                                       | 4.5 $\mu$ M             | 0.02 ~ 40 mM                                 | Anal. Chem. 2002, 74, 1322-1326                           |
| HRP–Fe <sub>3</sub> O <sub>4</sub> /m-silica | 0.43 $\mu$ M            | 0.002 ~ 0.024 mM                             | J. Mater. Chem., 2010, 20, 5030–5034                      |
| BiHCF nanoparticles                          | 0.07 $\mu$ M            | $6 \times 10^{-4}$ ~ 0.2 mM                  | J. Phys. Chem. C 112 (2008) 7617–7623                     |
| Ni/CuO/Pt                                    | 0.06 $\mu$ M            | $1.5 \times 10^{-4}$ –9 mM                   | Journal of Electroanalytical Chemistry 612 (2008) 157–163 |
| Hb/TiO <sub>2</sub> NP/PG                    | 0.2 $\mu$ M             | 0.009 ~ 0.1 mM                               | Anal. Chem. 2005, 77, 6102-6104                           |
| Nafion/HRP/TN-3/TTO                          | 0.18 $\mu$ M            | 0.001 ~ 0.78 mM                              | J. Mater. Chem., 2012, 22, 9019–9026                      |
| HRP/FeMeOH                                   | 2.5 $\mu$ M             | 0.1 ~ 1.5 mM                                 | Adv. Mater. 2010, 22, 2809–2813                           |
| HRP–GSSs                                     | 0.1 $\mu$ M             | 0.001 ~ 2.6 mM                               | Adv. Funct. Mater. 2010, 20, 3366–3372                    |
| SBP                                          | 0.5 $\mu$ M             | $5 \times 10^{-4}$ ~ $3 \times 10^{-3}$ mM   | Anal. Chem. 1999, 71, 1935-1939                           |
